# Supplementary material
Source: publisher figshare collection journal article supplement (https://gsajournals.figshare.com/ndownloader/files/20021771)
Supplement: Supplementary file 1 [file 20021771]

## Sheet: Sheet1
Supplementary Table 4. Genetic (upper triangle) and residual (lower triangle) covariance estimates (± standard error) between all 17 traits, estimated by using bivariate model analysis.
		SBP		DBP		TG		HDL-C		ht		wt		BMI		WC		WHtR		uCre		uCl		uK		CysC		SCre		SUA		BUN		Hb
SBP				0.074 (± 0.027)		-0.024 (± 0.022)		0.034 (± 0.022)		-0.038 (± 0.022)		-0.016 (± 0.022)		0.003 (± 0.023)		-0.006 (± 0.022)		0.008 (± 0.023)		-0.006 (± 0.019)		-0.005 (± 0.019)		-0.029 (± 0.019)		-0.014 (± 0.019)		-0.012 (± 0.019)		0.008 (± 0.020)		-0.030 (± 0.019)		-0.003 (± 0.020)
DBP		0.660 (± 0.028)				0.011 (± 0.022)		0.024 (± 0.022)		-0.007 (± 0.022)		-0.005 (± 0.023)		-0.004 (± 0.023)		-0.005 (± 0.023)		-0.002 (± 0.023)		-0.005 (± 0.019)		-0.014 (± 0.019)		-0.017 (± 0.019)		0.001 (± 0.019)		0.018 (± 0.020)		0.011 (± 0.020)		-0.022 (± 0.019)		0.014 (± 0.020)
TG		0.123 (± 0.022)		0.100 (± 0.022)				-0.105 (± 0.024)		-0.013 (± 0.022)		0.015 (± 0.023)		0.024 (± 0.023)		0.029 (± 0.023)		0.034 (± 0.023)		-0.024 (± 0.019)		-0.003 (± 0.019)		-0.009 (± 0.019)		0.011 (± 0.019)		0.016 (± 0.020)		0.051 (± 0.020)		0.019 (± 0.019)		0.024 (± 0.020)
HDL-C		-0.047 (± 0.022)		-0.032 (± 0.022)		-0.308 (± 0.024)				0.003 (± 0.022)		-0.054 (± 0.023)		-0.056 (± 0.023)		-0.056 (± 0.023)		-0.054 (± 0.023)		-0.021 (± 0.019)		-0.037 (± 0.019)		-0.021 (± 0.019)		-0.060 (± 0.020)		-0.024 (± 0.020)		-0.033 (± 0.020)		0.003 (± 0.019)		-0.005 (± 0.020)
ht		0.020 (± 0.022)		0.034 (± 0.022)		0.014 (± 0.022)		-0.016 (± 0.021)				0.165 (± 0.024)		-0.070 (± 0.023)		0.034 (± 0.023)		-0.132 (± 0.023)		0.016 (± 0.019)		0.022 (± 0.019)		0.037 (± 0.019)		-0.020 (± 0.020)		0.012 (± 0.020)		0.005 (± 0.020)		0.019 (± 0.020)		-0.001 (± 0.020)
wt		0.205 (± 0.023)		0.214 (± 0.023)		0.221 (± 0.023)		-0.247 (± 0.023)		0.193 (± 0.023)				0.195 (± 0.030)		0.190 (± 0.030)		0.135 (± 0.028)		0.031 (± 0.019)		0.059 (± 0.019)		0.052 (± 0.019)		0.008 (± 0.020)		-0.001 (± 0.020)		0.024 (± 0.020)		-0.013 (± 0.019)		-0.006 (± 0.020)
BMI		0.204 (± 0.023)		0.212 (± 0.023)		0.227 (± 0.023)		-0.259 (± 0.023)		-0.008 (± 0.022)		0.697 (± 0.030)				0.188 (± 0.030)		0.212 (± 0.030)		0.025 (± 0.019)		0.053 (± 0.019)		0.035 (± 0.019)		0.019 (± 0.020)		-0.005 (± 0.020)		0.019 (± 0.020)		-0.025 (± 0.019)		-0.005 (± 0.020)
WC		0.194 (± 0.023)		0.197 (± 0.023)		0.234 (± 0.023)		-0.262 (± 0.023)		0.084 (± 0.022)		0.678 (± 0.030)		0.685 (± 0.030)				0.194 (± 0.031)		0.022 (± 0.019)		0.054 (± 0.019)		0.040 (± 0.019)		0.027 (± 0.020)		-0.018 (± 0.020)		0.026 (± 0.020)		-0.016 (± 0.019)		0.010 (± 0.020)
WHtR		0.181 (± 0.023)		0.181 (± 0.023)		0.224 (± 0.023)		-0.255 (± 0.023)		-0.062 (± 0.022)		0.603 (± 0.028)		0.675 (± 0.030)		0.750 (± 0.031)				0.017 (± 0.019)		0.047 (± 0.019)		0.026 (± 0.019)		0.034 (± 0.020)		-0.020 (± 0.020)		0.023 (± 0.020)		-0.021 (± 0.019)		0.011 (± 0.020)
uCre		-0.056 (± 0.020)		-0.046 (± 0.020)		0.018 (± 0.020)		-0.039 (± 0.020)		0.022 (± 0.020)		0.029 (± 0.020)		0.021 (± 0.020)		0.020 (± 0.021)		0.012 (± 0.020)				0.026 (± 0.018)		0.014 (± 0.019)		0.014 (± 0.017)		-0.002 (± 0.017)		-0.010 (± 0.017)		-0.012 (± 0.017)		-0.013 (± 0.017)
uCl		0.025 (± 0.020)		0.022 (± 0.020)		0.033 (± 0.020)		0.005 (± 0.020)		-0.002 (± 0.019)		0.041 (± 0.020)		0.043 (± 0.020)		0.033 (± 0.020)		0.032 (± 0.020)		0.372 (± 0.019)				0.025 (± 0.019)		-0.034 (± 0.017)		-0.058 (± 0.017)		-0.023 (± 0.017)		-0.012 (± 0.017)		0.007 (± 0.017)
uK		-0.057 (± 0.020)		-0.048 (± 0.020)		-0.009 (± 0.020)		0.005 (± 0.020)		0.007 (± 0.020)		0.000 (± 0.020)		-0.001 (± 0.020)		-0.006 (± 0.020)		-0.007 (± 0.020)		0.576 (± 0.021)		0.554 (± 0.020)				-0.017 (± 0.017)		-0.046 (± 0.017)		-0.020 (± 0.017)		-0.034 (± 0.017)		0.004 (± 0.017)
CysC		0.029 (± 0.020)		0.009 (± 0.020)		0.089 (± 0.020)		-0.120 (± 0.019)		0.026 (± 0.019)		0.144 (± 0.020)		0.141 (± 0.020)		0.133 (± 0.020)		0.123 (± 0.020)		0.068 (± 0.017)		-0.017 (± 0.017)		0.028 (± 0.017)				0.152 (± 0.020)		0.092 (± 0.018)		0.017 (± 0.017)		0.032 (± 0.018)
SCre		-0.007 (± 0.020)		-0.016 (± 0.020)		0.043 (± 0.020)		-0.039 (± 0.020)		0.069 (± 0.019)		0.095 (± 0.020)		0.072 (± 0.020)		0.059 (± 0.020)		0.037 (± 0.020)		0.141 (± 0.018)		-0.018 (± 0.018)		0.080 (± 0.018)		0.399 (± 0.020)				0.077 (± 0.018)		0.045 (± 0.018)		0.010 (± 0.018)
SUA		0.075 (± 0.020)		0.094 (± 0.020)		0.123 (± 0.020)		-0.087 (± 0.019)		0.011 (± 0.019)		0.198 (± 0.020)		0.208 (± 0.020)		0.205 (± 0.020)		0.199 (± 0.020)		0.058 (± 0.017)		-0.056 (± 0.017)		0.050 (± 0.017)		0.229 (± 0.018)		0.248 (± 0.018)				-0.012 (± 0.017)		-0.004 (± 0.018)
BUN		-0.030 (± 0.020)		-0.052 (± 0.020)		-0.047 (± 0.020)		0.061 (± 0.020)		-0.023 (± 0.019)		0.031 (± 0.020)		0.047 (± 0.020)		0.022 (± 0.020)		0.029 (± 0.020)		0.164 (± 0.018)		0.161 (± 0.018)		0.247 (± 0.018)		0.180 (± 0.018)		0.262 (± 0.018)		0.168 (± 0.018)				-0.015 (± 0.017)
Hb		0.139 (± 0.021)		0.203 (± 0.021)		0.126 (± 0.021)		-0.043 (± 0.020)		0.023 (± 0.020)		0.145 (± 0.021)		0.144 (± 0.021)		0.146 (± 0.021)		0.136 (± 0.021)		0.030 (± 0.018)		-0.029 (± 0.018)		0.007 (± 0.018)		-0.003 (± 0.018)		-0.025 (± 0.018)		0.140 (± 0.018)		-0.072 (± 0.018)
BMI, body mass index; BUN, blood urea nitrogen; CysC, cystatin C; DBP, diastolic blood pressure; Hb, Hemoglobin; HDL-C, high-density lipoprotein cholesterol; ht, height; SBP, systolic blood pressure; SCre, serum creatinine; SUA, serum uric acid; TG, triglycerides; uCl, urine chloride; uCre, urine creatinine; uK, urine potassium; WC, waist circumference; WHtR, waist-to-height-ratio; wt, weight.
